# Supplementary material for: Primary healthcare system readiness for the prevention and management of non- communicable diseases in Nepal
Source: Research Square preprint supplement (doi:10.21203/rs.3.rs-9699438/v1), 2026-07-15
Supplement: Supplementary file 1 [file 691685aae56017cb25ee12c2.docx]

Supplementary table 3: Summary of primary level health service providers interviewed (n=47)

| **Type of primary healthcare facility and designation of healthcare staff** | **Female, N** | **Male, N** |
| --- | --- | --- |
| **Primary Healthcare Centers (PHCCs)** |  |  |
| Medical officer | 0 | 6 |
| Public Health Inspector | 0 | 1 |
| Health Assistant | 3 | 5 |
| Senior Auxiliary Health Worker | 1 | 3 |
| Senior Auxiliary Nurse Midwife | 1 | 0 |
| Auxiliary Health Worker | 0 | 1 |
| ***Total*** | 5 | 16 |
| **Health Posts** |  |  |
| Public Health Inspector | 0 | 3 |
| Senior Health Assistant | 0 | 1 |
| Health Assistant | 4 | 2 |
| Senior Auxiliary Health Worker | 0 | 7 |
| Auxiliary Health Worker | 2 | 1 |
| Senior Auxiliary Nurse Midwife | 2 | 0 |
| Auxiliary Nurse Midwife | 4 | 0 |
| ***Total*** | 12 | 14 |
