# Supplementary material for: Primary healthcare system readiness for the prevention and management of non- communicable diseases in Nepal
Source: Research Square preprint supplement (doi:10.21203/rs.3.rs-9699438/v1), 2026-07-15
Supplement: Supplementary file 2 [file c9f947bc8d5c8494c16768be.docx]

Supplementary table 1: Summary of computation of service readiness indices for NCDs (DM, CVD, and CRD)

| **Domains** | **Domain score (%)** | **DM** | | **CVDs** | | **CRDs** | |
| --- | --- | --- | --- | --- | --- | --- | --- |
| **Indicator** | **Indicator score (%)** | **Indicator** | **Indicator score (%)** | **Indicator** | **Indicator score (%)** |
| 1. Staff training | 33.33 | Guidelines for the management of DM | 16.67 | Guidelines for the management of CVDs | 16.67 | Guidelines for the management of CRDs | 16.67 |
| Staff trained in the diagnosis and management of DM | 16.67 | Staff trained in the diagnosis and management of CVDs | 16.67 | Staff trained in the diagnosis and management of CRDs | 16.67 |
| 2. Basic diagnostic equipment | 33.33 | Weight scale | 5.56 | Stethoscope | 8.33 | Stethoscope | 8.33 |
| Height scale | 5.56 | Blood pressure apparatus | 8.33 | Oxygen | 8.33 |
| Glucometer | 5.56 | Weighing scale | 8.33 | Peak flow meter | 8.33 |
| Blood glucose test strips | 5.56 | Measuring tape | 8.33 | Spacers | 8.33 |
| Urine dipstick protein | 5.56 |  |  |  |  |
| Urine dipstick ketone | 5.56 |  |  |  |  |
| Basic medicines | 33.33 | Metformin | 8.33 | Amlodipine | 4.17 | Salbutamol | 6.67 |
| Glimepiride | 8.33 | Enalapril | 4.17 | Beclomethasone | 6.67 |
| Insulin | 8.33 | Aspirin | 4.17 | Hydrocortisone | 6.67 |
| Injection dextrose | 8.33 | Hydrochlorothiazide | 4.17 | Prednisolone | 6.67 |
|  |  | Adrenaline | 4.17 | Adrenaline | 6.67 |
|  |  | Atorvastatin | 4.17 |  |  |
|  |  | Furosemide | 4.17 |  |  |
|  |  | Metformin | 4.17 |  |  |
| **Composite index** | **100** |  |  |  | **100** |  | **100** |

*NCDs: Non-communicable diseases, DM: Diabetes Mellitus, CVDs: Cardiovascular Diseases, CRDs: Chronic Respiratory Diseases*
