# Supplementary material for: Primary healthcare system readiness for the prevention and management of non- communicable diseases in Nepal
Source: Research Square preprint supplement (doi:10.21203/rs.3.rs-9699438/v1), 2026-07-15
Supplement: Supplementary file 3 [file dd59a5e55da720c3f64f2531.docx]

Supplementary table 2: Summary of health authorities interviewed (N=23)

| **Health authorities** | **Female, N** | **Male, N** |
| --- | --- | --- |
| **Federal government** |  |  |
| WHO PEN Field Coordinator | 0 | 1 |
| NCD and Mental Health Section Chief, EDCD | 0 | 1 |
| Senior PHO, MOHP | 0 | 1 |
| ***Total*** | 0 | 3 |
| **Provincial government** |  |  |
| Senior Nursing Officer | 1 | 0 |
| Senior Auxiliary Health Worker | 0 | 1 |
| Senior Health Education Officer | 0 | 1 |
| Public Health Section Officer | 0 | 1 |
| ***Total*** | 1 | 3 |
| **Local government** |  |  |
| Senior Public Health Officer, District | 0 | 2 |
| Public Health Officer, District | 0 | 3 |
| Public Health Officer, Municipality | 0 | 1 |
| Health Coordinator, Municipality | 0 | 3 |
| Health Coordinator, District | 0 | 1 |
| Health Officer, District | 0 | 3 |
| Public Health Inspector, District | 0 | 1 |
| Medical Officer, District | 0 | 1 |
| Health Assistant, District | 0 | 1 |
| ***Total*** | 0 | 16 |

*WHO: World Health Organization, NCD: Non-communicable Diseases, EDCD: Epidemiology Disease Control Division, PHO: Public Health Officer, MOHP: Ministry of Health and Population*
